# Supplementary material for: The biodiversity of the United Kingdom’s Overseas Territories: a stock take of species occurrence and assessment of key knowledge gaps
Source: Springer Nature journal article supplement (doi:10.1007/s10531-016-1149-z), 2016-06-11
Supplement: MOESM1 [file 10256642]

Title: The biodiversity of the United Kingdom's Overseas Territories: a stock take of species occurrence and assessment of key knowledge gaps

Journal title: Biodiversity and Conservation

Authors: Churchyard, T.<sup>1</sup>, Eaton, M.A.<sup>1</sup>, Havery, S.<sup>1</sup>, Hall, J.<sup>1</sup>, Millett, J.<sup>1</sup>, Farr, A.<sup>2</sup>, Cuthbert, R.<sup>1,3</sup>, Stringer C.<sup>1</sup>, Vickery, J.A.<sup>1</sup>

Affiliations: <sup>1</sup> Royal Society for the Protection of Birds, <sup>2</sup> Buglife <sup>3</sup>Wildlife Conservation Society

Corresponding author: Thomas Churchyard thomas.churchyard@rspb.org.uk

**Online Resource 1.** Explanatory variables used in GLMs to describe UKOT biodiversity knowledge

| Variable group     | Variable                                   | Description                                                    |
|--------------------|--------------------------------------------|----------------------------------------------------------------|
| Geography          | UKOT area                                  | Km <sup>2</sup>                                                |
| Geography          | Longitude                                  |                                                                |
| Geography          | Latitude                                   |                                                                |
| Geography          | Ocean/Sea                                  | Antarctic, Atlantic, Caribbean, Indian, Mediterranean, Pacific |
| Geography          | Distance from London                       | To UKOT capital (km)                                           |
| Geography          | Distance from nearest continental landmass | To UKOT capital (km)                                           |
| Economy            | GDP (US Dollars)                           | US Dollars                                                     |
| Economy            | GDP per capita (US Dollars)                | US Dollars                                                     |
| Recording capacity | Presence of keen specialist recorder(s)    | Yes/no                                                         |
| Recording capacity | Relevant higher learning/research station  | Yes/no                                                         |
| Recording          | Total population                           |                                                                |

|                    |                             |  |
|--------------------|-----------------------------|--|
| capacity           |                             |  |
| Recording capacity | Annual visitor numbers      |  |
| History            | Date of European discovery  |  |
| History            | Date of European settlement |  |
| History            | Date of UK annexation       |  |
