# Supplementary material for: The biodiversity of the United Kingdom’s Overseas Territories: a stock take of species occurrence and assessment of key knowledge gaps
Source: Springer Nature journal article supplement (doi:10.1007/s10531-016-1149-z), 2016-06-11
Supplement: MOESM2 [file 10256642]

Title: The biodiversity of the United Kingdom's Overseas Territories: a stock take of species occurrence and assessment of key knowledge gaps

Journal title: Biodiversity and Conservation

Authors: Churchyard, T.<sup>1</sup>, Eaton, M.A.<sup>1</sup>, Havery, S<sup>1</sup>., Hall, J.<sup>1</sup>, Millett, J.<sup>1</sup>, Farr, A.<sup>2</sup>, Cuthbert, R.<sup>1,3</sup>, Stringer C.<sup>1</sup>, Vickery, J.A.<sup>1</sup>

Affiliations: <sup>1</sup> Royal Society for the Protection of Birds, <sup>2</sup> Buglife <sup>3</sup>Wildlife Conservation Society

Corresponding author: Thomas Churchyard thomas.churchyard@rspb.org.uk

**Online Resource 2.** Totals of known species for each taxonomic group, by UKOT.

| Group                  | Anguilla | Bermuda | BVI | Cayman | Montserrat | TCI | Jersey | St Helena | Tristan | Falklands | SGSSI | BIOT | Pitcairn | BAT | Gibraltar | Cyprus SBAs | UKOT Total |
|------------------------|----------|---------|-----|--------|------------|-----|--------|-----------|---------|-----------|-------|------|----------|-----|-----------|-------------|------------|
| Mammals                | 13       | 18      | 12  | 13     | 17         | 12  | 9      | 4         | 22      | 34        | 17    | 6    | 22       | 21  | 22        | 12          | 105        |
| Birds                  | 137      | 368     | 166 | 223    | 125        | 172 | 15     | 41        | 99      | 128       | 79    | 113  | 51       | 42  | 307       | 300         | 966        |
| Reptiles               | 17       | 7       | 27  | 26     | 12         | 17  | 3      | 3         | 0       | 0         | 0     | 3    | 7        | 0   | 25        | 28          | 130        |
| Amphibians             | 0        | 0       | 4   | 1      | 2          | 0   | 0      | 0         | 0       | 0         | 0     | 0    | 0        | 0   | 2         | 3           | 12         |
| Fish                   | 215      | 856     | 330 | 329    | 136        | 343 | 97     | 152       | 74      | 70        | 113   | 859  | 422      | 118 | 379       | 4           | 2809       |
| Tunicates              | 2        | 83      |     | 4      |            |     | 1      |           | 18      | 97        | 88    |      |          | 49  | 4         |             | 310        |
| Insects                | 20       | 1019    | 900 | 1216   | 1067       | 46  | 238    | 679       | 163     | 325       | 68    | 368  | 144      | 3   | 1185      | 291         | 7044       |
| Collembola             |          | 3       |     |        |            |     | 12     | 16        | 3       | 29        | 20    | 10   |          | 9   |           |             | 96         |
| Arachnids              | 24       | 89      | 56  | 64     | 45         | 1   | 68     | 190       | 27      | 51        | 110   |      | 36       | 115 | 16        |             | 816        |
| Centipedes& Millipedes |          | 22      |     | 11     |            |     | 7      | 24        | 4       |           |       |      |          | 0   |           |             | 65         |
| Sea Spiders            |          | 17      |     |        |            |     |        | 2         | 6       | 18        | 57    |      |          | 91  |           |             | 173        |

|                     |         |          |          |          |          |          |         |          |          |          |          |          |          |          |          |          |       |
|---------------------|---------|----------|----------|----------|----------|----------|---------|----------|----------|----------|----------|----------|----------|----------|----------|----------|-------|
| Tardigrades         | 2       | 7        |          |          |          |          |         |          |          |          | 16       |          |          | 20       |          |          | 38    |
| Crustaceans         | 37      | 149<br>2 | 45       | 62       | 32       | 157      | 69      | 66       | 180      | 123      | 543      | 94       | 95       | 614      | 47       | 43       | 3244  |
| Echinoderms         | 1       | 101      | 1        | 15       |          | 11       | 2       | 42       | 25       | 47       | 178      | 36       | 62       | 136      | 3        | 3        | 536   |
| Molluscs            | 25      | 961      | 84       | 505      | 26       | 149      | 47      | 265      | 79       | 374      | 200      | 377      | 609      | 268      | 129      | 15       | 3454  |
| Brachiopods         |         | 2        |          | 1        |          | 1        |         |          |          | 2        | 3        |          | 1        | 22       |          |          | 30    |
| Worms               | 1       | 753      |          | 5        | 4        | 5        | 28      | 8        | 95       | 37       | 448      | 4        |          | 234      | 21       | 1        | 1526  |
| Cnidaria            | 36      | 426      | 56       | 74       | 40       | 100      | 10      | 19       | 58       | 64       | 169      | 407      | 126      | 62       | 1        |          | 1310  |
| Ctenophores         |         |          |          |          |          |          |         |          |          | 6        | 2        |          |          | 4        |          |          | 10    |
| Bryozoans           |         | 84       |          |          |          |          |         |          | 48       | 35       | 198      |          |          | 200      | 4        |          | 503   |
| Sponges             |         | 133      | 1        | 27       |          | 1        |         |          | 48       | 59       | 83       |          | 15       | 128      | 2        | 2        | 446   |
| Vascular Plants     | 19<br>8 | 166      |          | 415      | 799      | 478      | 25      | 81       | 100      | 184      | 31       | 44       | 80       | 2        | 657      | 328      | 3544  |
| non-vascular plants |         |          |          |          |          |          |         |          | 254      |          |          |          |          | 130      | 12       |          | 396   |
| Algae               |         | 886      | 343      | 195      | 33       | 121      | 99      | 71       | 193      | 161      | 99       | 152      | 86       | 22       | 23       |          | 1711  |
| Lichens             |         | 89       | 1        |          |          |          | 97      | 222      | 85       | 259      | 251      | 77       | 27       | 276      |          |          | 1089  |
| Fungi               |         | 766      | 113      | 1        |          | 2        |         |          | 49       | 335      | 113      | 25       |          | 135      | 4        |          | 1144  |
| Other               | 35      | 780      | 51       | 1        | 1        | 34       |         |          | 16       | 81       | 218      | 179      | 31       |          |          |          | 1001  |
| OT Total            | 76<br>1 | 912<br>8 | 331<br>5 | 318<br>8 | 233<br>9 | 165<br>0 | 82<br>7 | 188<br>5 | 164<br>6 | 251<br>9 | 310<br>4 | 275<br>4 | 181<br>4 | 270<br>1 | 284<br>3 | 103<br>0 | 32112 |
