# Supplementary material for: The biodiversity of the United Kingdom’s Overseas Territories: a stock take of species occurrence and assessment of key knowledge gaps
Source: Springer Nature journal article supplement (doi:10.1007/s10531-016-1149-z), 2016-06-11
Supplement: MOESM3 [file 10256642]

|                     |   |         |    |         |    |    |    |         |         |    |    |   |    |   |   |   |      |
|---------------------|---|---------|----|---------|----|----|----|---------|---------|----|----|---|----|---|---|---|------|
| Vascular Plants     | 1 | 14      | 0  | 28      | 3  | 9  | 7  | 44      | 57      | 14 | 0  | 0 | 9  | 0 | 2 | 0 | 188  |
| non-vascular plants | 0 | 5       | 4  | 0       | 0  | 0  | 0  | 0       | 47      | 46 | 11 | 0 | 10 | 0 | 0 | 0 | 123  |
| Algae               | 0 | 2       | 0  | 0       | 0  | 0  | 1  | 0       | 3       | 0  | 4  | 1 | 0  | 0 | 0 | 0 | 11   |
| Lichens             | 0 | 0       | 0  | 0       | 0  | 0  | 0  | 8       | 0       | 0  | 50 | 0 | 0  | 0 | 0 | 0 | 58   |
| Fungi               | 0 | 26      | 0  | 0       | 0  | 0  | 0  | 0       | 0       | 0  | 0  | 0 | 0  | 0 | 0 | 0 | 26   |
| Other               | 0 | 3       | 0  | 0       | 0  | 0  | 0  | 0       | 0       | 0  | 0  | 0 | 0  | 0 | 0 | 0 | 3    |
| OT Total            | 5 | 32<br>1 | 14 | 10<br>6 | 85 | 16 | 48 | 50<br>2 | 18<br>3 | 82 | 77 | 9 | 99 | 0 | 2 | 0 | 1549 |
