# Supplementary material for: The biodiversity of the United Kingdom’s Overseas Territories: a stock take of species occurrence and assessment of key knowledge gaps
Source: Springer Nature journal article supplement (doi:10.1007/s10531-016-1149-z), 2016-06-11
Supplement: MOESM4 [file 10256642]

Title: The biodiversity of the United Kingdom's Overseas Territories: a stock take of species occurrence and assessment of key knowledge gaps

Journal title: Biodiversity and Conservation

Authors: Churchyard, T.<sup>1</sup>, Eaton, M.A.<sup>1</sup>, Havery, S<sup>1</sup>., Hall, J.<sup>1</sup>, Millett, J.<sup>1</sup>, Farr, A.<sup>2</sup>, Cuthbert, R.<sup>1,3</sup>, Stringer C.<sup>1</sup>, Vickery, J.A.<sup>1</sup>

Affiliations: <sup>1</sup> Royal Society for the Protection of Birds, <sup>2</sup> Buglife <sup>3</sup>Wildlife Conservation Society

Corresponding author: Thomas Churchyard thomas.churchyard@rspb.org.uk

**Online Resource 4.** Breakdown of Red List assessments for the UKOTs, UKOT endemics and global Red List (calculations based on IUCN Red List version 2014.3 updated 13 November 2014).

|                 | UKOTs (inc. Endemic) |                         |                       | UKOT Endemics |                         |                       | IUCN Red List |                         |                       |
|-----------------|----------------------|-------------------------|-----------------------|---------------|-------------------------|-----------------------|---------------|-------------------------|-----------------------|
|                 | No. assessed         | No. Globally Threatened | % Globally Threatened | No. Assessed  | No. Globally Threatened | % Globally Threatened | No. Assessed  | No. Globally Threatened | % Globally Threatened |
| Mammals         | 109                  | 11                      | <b>10.1</b>           | -             | -                       | -                     | 5,513         | 1,231                   | <b>22.3</b>           |
| Birds           | 986                  | 74                      | <b>7.5</b>            | 22            | 19                      | <b>86.4</b>           | 10,425        | 1,391                   | <b>13.3</b>           |
| Reptiles        | 77                   | 30                      | <b>30.9</b>           | 10            | 9                       | <b>90.0</b>           | 4,414         | 942                     | <b>21.3</b>           |
| Amphibians      | 19                   | 2                       | <b>10.5</b>           | 2             | 1                       | <b>50.0</b>           | 6,414         | 2,069                   | <b>32.3</b>           |
| Fish            | 661                  | 24                      | <b>3.6</b>            | 3             | 1                       | <b>33.3</b>           | 12,457        | 2,308                   | <b>18.5</b>           |
| Insects         | 55                   | 2                       | <b>3.6</b>            | 3             | 1                       | <b>33.3</b>           | 5,304         | 1,034                   | <b>19.5</b>           |
| Crustaceans     | 56                   | 23                      | <b>41.1</b>           | 23            | 21                      | <b>91.3</b>           | 3,164         | 742                     | <b>23.5</b>           |
| Molluscs        | 40                   | 11                      | <b>27.5</b>           | 12            | 9                       | <b>75.0</b>           | 7,217         | 2,068                   | <b>28.7</b>           |
| Worms           | 3                    | 2                       | <b>66.7</b>           | 3             | 2                       | <b>66.7</b>           | 17            | 8                       | <b>47.1</b>           |
| Cnidaria        | 314                  | 60                      | <b>17.6</b>           | 1             | 1                       | <b>100</b>            | 858           | 238                     | <b>27.7</b>           |
| Vascular Plants | 286                  | 117                     | <b>40.9</b>           | 68            | 47                      | <b>69.1</b>           | 18,931        | 10,219                  | <b>53.9</b>           |

|        |       |     |              |     |     |             |        |        |             |
|--------|-------|-----|--------------|-----|-----|-------------|--------|--------|-------------|
| Totals | 2,606 | 356 | <b>13.66</b> | 147 | 111 | <b>75.5</b> | 74,714 | 22,250 | <b>29.8</b> |
|--------|-------|-----|--------------|-----|-----|-------------|--------|--------|-------------|
